# Supplementary material for: Gadget addiction among school-going children and its association to cognitive function: a cross-sectional survey from Bangladesh
Source: PubMed Central journal article supplement — BMJ Paediatr Open. 2023 Feb 17;7(1):e001759. doi: 10.1136/bmjpo-2022-001759 (PMC9944298; doi:10.1136/bmjpo-2022-001759), 2023-02-17
Supplement: bmjpo-2022-001759.draft_revisions.pdf [file bmjpo-2022-001759.draft_revisions.pdf]

# BMJ Paediatrics Open

BMJ Paediatrics Open is committed to open peer review. As part of this commitment we make the peer review history of every article we publish publicly available.

When an article is published we post the peer reviewers' comments and the authors' responses online. We also post the versions of the paper that were used during peer review. These are the versions that the peer review comments apply to.

The versions of the paper that follow are the versions that were submitted during the peer review process. They are not the versions of record or the final published versions. They should not be cited or distributed as the published version of this manuscript.

BMJ Paediatrics Open is an open access journal and the full, final, typeset and author-corrected version of record of the manuscript is available on our site with no access controls, subscription charges or pay-per-view fees (<http://bmjpaedsopen.bmj.com>).

If you have any questions on BMJ Paediatrics Open's open peer review process please email [info.bmjpo@bmj.com](mailto:info.bmjpo@bmj.com)

# BMJ Paediatrics Open

## Gadget Addiction among School Going Children and their Association to Cognitive Function: A Cross-sectional Survey from Bangladesh

|                               |                                                                                                                                                                                                                                                                                                                                                                                                                                                                                                                                                                                                                                                              |
|-------------------------------|--------------------------------------------------------------------------------------------------------------------------------------------------------------------------------------------------------------------------------------------------------------------------------------------------------------------------------------------------------------------------------------------------------------------------------------------------------------------------------------------------------------------------------------------------------------------------------------------------------------------------------------------------------------|
| Journal:                      | <i>BMJ Paediatrics Open</i>                                                                                                                                                                                                                                                                                                                                                                                                                                                                                                                                                                                                                                  |
| Manuscript ID                 | bmjpo-2022-001759                                                                                                                                                                                                                                                                                                                                                                                                                                                                                                                                                                                                                                            |
| Article Type:                 | Original research                                                                                                                                                                                                                                                                                                                                                                                                                                                                                                                                                                                                                                            |
| Date Submitted by the Author: | 07-Nov-2022                                                                                                                                                                                                                                                                                                                                                                                                                                                                                                                                                                                                                                                  |
| Complete List of Authors:     | Liza, Mowshomi Mannan; North South University, Department of Public Health; School of Research<br>Iktidar, Mohammad Azmain; North South University, Department of Public Health; School of Research<br>Roy, Simanta; North South University, Department of Public Health; School of Research<br>Jallow, Musa; Medical Research Council Unit The Gambia at the London School of Hygiene and Tropical Medicine<br>Chowdhury, Sreshtha; North South University, Department of Public Health; School of Research<br>Tabassum, Mustari Nailah; Chittagong Medical College; School of Research<br>Mahmud, Tarannum; Chittagong Medical College; School of Research |
| Keywords:                     | Child Psychiatry, Epidemiology                                                                                                                                                                                                                                                                                                                                                                                                                                                                                                                                                                                                                               |
|                               |                                                                                                                                                                                                                                                                                                                                                                                                                                                                                                                                                                                                                                                              |

SCHOLARONE™  
Manuscripts

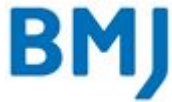

I, the Submitting Author has the right to grant and does grant on behalf of all authors of the Work (as defined in the below author licence), an exclusive licence and/or a non-exclusive licence for contributions from authors who are: i) UK Crown employees; ii) where BMJ has agreed a CC-BY licence shall apply, and/or iii) in accordance with the terms applicable for US Federal Government officers or employees acting as part of their official duties; on a worldwide, perpetual, irrevocable, royalty-free basis to BMJ Publishing Group Ltd ("BMJ") its licensees and where the relevant Journal is co-owned by BMJ to the co-owners of the Journal, to publish the Work in this journal and any other BMJ products and to exploit all rights, as set out in our [licence](#).

The Submitting Author accepts and understands that any supply made under these terms is made by BMJ to the Submitting Author unless you are acting as an employee on behalf of your employer or a postgraduate student of an affiliated institution which is paying any applicable article publishing charge ("APC") for Open Access articles. Where the Submitting Author wishes to make the Work available on an Open Access basis (and intends to pay the relevant APC), the terms of reuse of such Open Access shall be governed by a Creative Commons licence – details of these licences and which [Creative Commons](#) licence will apply to this Work are set out in our licence referred to above.

Other than as permitted in any relevant BMJ Author's Self Archiving Policies, I confirm this Work has not been accepted for publication elsewhere, is not being considered for publication elsewhere and does not duplicate material already published. I confirm all authors consent to publication of this Work and authorise the granting of this licence.

1  
2  
3 **Title: Gadget Addiction among School Going Children and their Association to Cognitive**  
4 **Function: A Cross-sectional Survey from Bangladesh**  
5

6  
7 **Mowshomi Mannan Liza**<sup>1</sup>, Mohammad Azmain Iktidar<sup>1\*</sup>, Simanta Roy<sup>1</sup>, Musa Jallow<sup>3</sup>, Sreshtha  
8 Chowdhury<sup>1</sup>, Tarannum Mahmud<sup>2</sup>, Mustari Nailah Tabassum<sup>2</sup>  
9

10  
11 <sup>1</sup> Department of Public Health, North South University, Dhaka 1229, Bangladesh.

12  
13 <sup>2</sup> Chittagong Medical College, Chattagram, Dhaka.

14  
15 <sup>3</sup> Medical Research Council Unit the Gambia at London School of Hygiene and Tropical  
16 Medicine  
17

18  
19  
20 **\*Corresponding author**

21 Mohammad Azmain Iktidar

22 MBBS, Mph

23 Department of Public Health,

24 North South University, Dhaka 1229, Bangladesh.

25 Email: [sazmain@gmail.com](mailto:sazmain@gmail.com)

26 ORCID: <https://orcid.org/0000-0002-9073-5451>  
27  
28  
29

30  
31  
32  
33  
34  
35 **Word Count**

36 2165

37  
38  
39 **Reference Count**

40 28  
41  
42  
43  
44  
45  
46  
47  
48  
49  
50  
51  
52  
53  
54  
55  
56  
57  
58  
59  
60

## Abstract

### Background

People are becoming more dependent on technology than ever before. Today's children and adults are heavily plugged into electronics, which raises concerns for their physical and cognitive development. This cross-sectional study was conducted to assess the relationship between media usage and cognitive function among school-aged children.

### Methods

This cross-sectional study was conducted in 11 schools in three of Bangladesh's most populous metropolitan areas: Dhaka, Chattogram, and Cumilla. A semi-structured questionnaire with three sections was utilized to obtain data from the respondents: (1) Background Information, (2) PedsQL™ Cognitive Functioning Scale, and (3) Problematic Media Use Measure Short Form. Stata (v.16) was used for statistical analysis. The ranges of the mean and standard deviation were used to summarize quantitative variables. Qualitative factors were summarized using frequency and percentage. The chi-square test and logistic regression model investigated bivariate and multivariate correlations, respectively.

### Results

The mean age of total 769 participants was  $12.02 \pm 1.80$  years, and the majority (67.31%) were females. The prevalence of high gadget addiction and poor cognitive function were 46.94% and 46.52% respectively among the participants. After adjusting the factors, this study found a statistically significant relationship (AOR: 0.44, CI: 0.29 to 0.66) between gadget addiction and cognitive function. Besides, the duration of breastfeeding was a predictor of cognitive function as well.

### Conclusion

Digital media addiction is associated with decreased cognitive performance in children who use digital gadgets regularly. Therefore, public awareness of harmful digital addictions in youngsters should be raised via interventions and education initiatives. Future interventions should screen schoolchildren for digital addictions and set daily restrictions on digital media device overuse.

**Keywords:** Digital, Gadget, Addiction, Cognitive function, School-going children.

## WHAT IS ALREADY KNOWN ON THIS TOPIC?

- School age is a time of rapid physical and mental growth for children.
- Both children and adults are excessively immersed in electronic gadgets in today's times
- Digital addiction has a detrimental effect on students' performance in classroom.
- Boys have a higher score of addiction to gadgets (66.3%).

## WHAT THIS STUDY ADDS

This study found a significant proportion of school-going children are addicted to digital gadgets. Gadget addiction have a statistically significant relationship with cognitive function of school going children.

## HOW THIS STUDY MIGHT AFFECT RESEARCH, PRACTICE, OR POLICY

This study recommends regular screening of gadget addictions among school-going children and future interventions as well as policies on daily recommended time limits of digital media device usage in children.

## Introduction

Around the world, people are increasing their reliance on technology devices at a rate that has never been seen before [1]. Not only adults but also children are excessively immersed in electronic gadgets in today's times, which generates issues and worries regarding the effects these devices have on children in terms of their physical and cognitive development [2,3]. Regarding the situation in Asia, a prior study that was carried out in six Asian nations concluded that children aged from 12 to 18 years held ownership of smartphones at a rate of 62% overall [3].

Numerous developments have taken place in the public sphere of the modern period, leading to an explosion of new forms of data transmission, social interaction, and leisure time activities. As technology continues to grow on a global scale, it is nearly impossible to live even without any form of digital screen [4]. Technological progress brings about inevitable changes in lifestyle, particularly in children. These changes include the habit of playing with gadgets, eating habits, physical activity levels, and the impacts of these changes [5]. There are identified benefits of digital device use, such as helping children acquire new vocabulary, languages, and stay engaged in the classroom [6]. However, the possible negative impact of digital device use and its problematic usage is also common. A study has shown that digital addiction has a detrimental effect on students' performance in classroom [7]. Children who spend an excessive amount of time in front of screens may have decreased levels of productivity [3]. Above mentioned studies indicate that there are a variety of advantages as well as drawbacks associated with the use of the various forms of the digital screen.

A cognitive function is any psychological process that is involved in the process of acquiring knowledge, the manipulation of information, or the logical derivation of conclusions [8]. The capabilities of perceiving, remembering, learning, paying attention, deliberating, and communicating are all included in the cognitive processes [8]. People who utilize digital screens for prolonged periods have been reported to have impaired cognitive regulation and cognitive inflexibility [9]. According to the findings of another study, digital addiction is connected with an increased number of reported cognitive failures [10].

School age is a time of rapid physical and mental growth for children [11]. There are increasing concerns about the effects of children's excessive screen usage on their growth and development [12]. According to the results of a survey, around two-thirds of students use the digital screen while

1  
2  
3 they should be paying attention in class, studying, or completing assignments [7]. The distraction  
4 that is resulted from this multitasking is one of the factors that has been proven to have a negative  
5 impact on students' academic performance [7]. There is limited evidence of digital addiction  
6 among children and its correlates in this geographic area. Therefore, this cross-sectional study was  
7 carried out to determine the extent of media use and it's the association with cognitive function  
8 among school-going children in the study region.  
9  
10  
11  
12  
13  
14  
15  
16  
17  
18  
19  
20  
21  
22  
23  
24  
25  
26  
27  
28  
29  
30  
31  
32  
33  
34  
35  
36  
37  
38  
39  
40  
41  
42  
43  
44  
45  
46  
47  
48  
49  
50  
51  
52  
53  
54  
55  
56  
57  
58  
59  
60



## Method

### Study design, setting, and sample

This cross-sectional study was carried out among children ages 8 to 14 enrolled in grades 4 to 7 at five private schools, five public schools, and one madrasah (a specially adapted institution for Islamic education and culture) in Bangladesh. The study locations were chosen using convenient sampling. A printed questionnaire with instructions was used to obtain information from the parent, while trained volunteers performed face-to-face interviews with the participant.

Participants in the selected schools were sent informational pamphlets, parental consent forms, and questionnaires. In addition, the pamphlets included a contact number for any more inquiries. Cognitive function assessment interviews were conducted with (n = 769) children who provided written parental consent and completed the questionnaire within one week. After receiving ethical permission (Approval no-2022/0R-NSU/IRB/1005) from the Institutional Review Board of North South University, data were gathered from January through May of 2022.

### Measures

A semi-structured questionnaire with three sections was used for data collection. Section one included questions on sociodemographic factors (age, gender, residence, family type, family income, and parental education status), birth order, method of delivery, EPI vaccination status, duration of breastfeeding, and deworming status. Sections two and three included two validated questionnaires (PedsQL™ Cognitive Functioning Scale and Problematic Media Use Measure Short Form) for measuring cognitive function and gadget addiction, respectively. The parents received sections one and three with precise instructions for completion. The remainder of the questionnaire (section 2: PedsQL™ Cognitive Functioning Scale) was completed by a trained volunteer after the participant's face-to-face interview.

### PedsQL™ Cognitive Functioning Scale

The PedsQL™ Cognitive Functioning Scale consists of six questions (“It is hard for me to keep my attention on things;” “It is hard for me to remember what people tell me;” “It is hard for me to remember what I just heard;” “It is hard for me to think quickly;” “I have trouble remembering what I was just thinking;” “I have trouble remembering more than one thing at a time.”) It was

1  
2  
3 produced through focus groups, cognitive interviews, pre-testing, and field-testing measurement  
4 development techniques [13]. Similar to the PedsQL™ 4.0 generic core scales, the structure,  
5 instructions, Likert scale, and scoring procedure are the same, with higher scores indicating fewer  
6 cognitive issues. Below the mean, this score indicated poor cognitive function.  
7  
8  
9

### 10 **Problematic Media Use Measure Short Form**

11  
12  
13 The Problematic Media Use Measure Short Form (PMUM–SF) was used to determine the level of  
14 screen addiction among all of the children in our study cohort. It includes nine components. Each  
15 answer was based on a five-point Likert scale: (1) never, (2) seldom, (3) sometimes, (4) often, and  
16 (5) always. Children who scored three or higher on at least five questions were deemed to have a  
17 high level of device addiction.  
18  
19  
20  
21

### 22 **Statistical analysis**

23  
24 All analyses were performed using Stata (version 16). Descriptive statistics were calculated as  
25 mean and standard deviations for quantitative variables or frequency and relative frequency for  
26 categorical variables. The bivariate association of two categorical variables was explored using the  
27 chi-squared ( $\chi^2$ ) test. A multiple logistic regression model was fitted to assess the association  
28 between cognitive function and gadget addiction. A two-tailed p-value of <0.05 was considered  
29 statistically significant.  
30  
31  
32  
33  
34  
35

### 36 **Pretesting**

37  
38 A pretesting was done on 20 participants from Government and Private schools to check the  
39 feasibility and reliability of the study. Necessary modifications were made to simplify the data  
40 collection without affecting the data quality. The inclusion of a helpline number in leaflets was  
41 considered upon the suggestions of the pilot participants.  
42  
43  
44  
45  
46  
47  
48  
49  
50  
51  
52  
53  
54  
55  
56  
57  
58  
59  
60

## Result

Background information of the study participants are presented in **Table 1**. Among the 769 participants, 67.31% were female and hailed from urban areas. About 78% of the participants were from nuclear families, and most of the participants' birth orders were second or more. Most of the participants' family income was 15000 BDT (Bangladeshi taka) or more. Regarding parental education, 52.5% of parents had ten or more years of schooling. In terms of birth, 26.32% of participants' modes of delivery were by CS, 44.02% were NVD by doctors, and 23.8% were NVD by others. Most of the participants were EPI (Expanded Program on Immunization) vaccinated. 10.78% of participants' duration of breastfeeding was less than six months, whereas 47.79% of participants were more than 24 months. About 3% of participants were never dewormed, whereas 49.08% were occasionally and 48.1% were regularly. The prevalence of high gadget addiction and poor cognitive function were 46.94% and 46.52% respectively among the participants (**Figure 1**).

### Table 1

### Figure 1

**Table 2** includes all the potential variables and demonstrates the adjusted result. After adjusting for age, gender, residence, family type, birth order, family income, parental education, mode of delivery, EPI vaccination status, duration of breastfeeding and deworming status, participants with high gadget addiction had 56% less chance of good cognitive function than those with low gadget addiction. Also, participants whose duration of breastfeeding was 6-12 months, 12-24 months, and more than 24 months had a higher chance of having good cognitive function than those who were breastfed for less than six months. Responses regarding the PMUM questionnaire are presented in **Table 3**.

### Table 2

### Table 3

## Discussion

The objective of this study was to determine the prevalence of gadget addiction and its association with cognitive functions among school-going children in Bangladesh. Using a semi-structured questionnaire we collected background information, and data estimating cognitive functions and gadget addictions via the PedsQL™ Cognitive Functioning Scale and PMUM–SF respectively. In this study, we found a high gadget addiction score in s of the participants; this result is similar to other studies reporting the growing prevalence of gadget addiction in different parts of the world. Similarly, previous research consisting of two systematic reviews and meta-analysis [2,14] confirm the increasing prevalence trend of gadget addiction over time in children and children.

The PMUM–SF scale is a validated and reliable tool used to estimate screen media addiction in children by measuring child screen time and psychosocial functioning [15–17]. The high gadget addiction score estimated by PMUM was found to be across all age groups, and of the total participants in this study, the median age was 12.03 years with females being the majority (67%). This is in contrast to a study conducted in India, which reported boys as having a higher gadget addiction score (66.3%) because they had longer screen time than girls [18]. Other studies suggest that the prevalence of problematic media use or gadget addiction among children and young adults often varies (ranging from 5-50%) [15,19].

Although we could not establish the significance, we observed that majority of the participants were from urban areas, belonged to nuclear families, had family income  $\geq 15,000$  BDT/month, and had parents with some level of education. These elements could potentially be indicative of higher socioeconomic status and therefore, children born from such families are more at risk of excessive screen exposure and gadget addiction. Few studies have demonstrated the link between high family income and screen or internet addiction, as well as poor sleep quality, thus confirming our theory [20,21].

Using the PedsQL™ Cognitive Functioning Scale which is a reliable and valid measure of cognitive functioning in children [13,22], we estimated the cognitive function of all participants in the study and determine their association with children with gadget addiction. Overall, we found that 53.48% of the children had a good cognitive function score, and children identified to have high gadget addiction scores had 57% less chance (AOR:0.43,95% CI:0.30-0.61,  $p < 0.001$ ) of having a good cognitive function compared to those with low gadget addiction. The adjusted

1  
2  
3 logistic regression analysis we did shows that as gadget addiction increases the level of poor  
4 cognitive function increases as well. A previous study conducted on children under 12 years of  
5 age in India, found that gadget media addiction has a close association with decreased cognitive  
6 function [18]. The study findings indicated that increased screen time and gadget addiction were  
7 significantly associated with parental concerns in some cognitive elements such as problem-  
8 solving, communication, and personal-social development [18]. Previous research further supports  
9 this, reporting the significant association between increased screen time and delays in cognition,  
10 language, and developmental motor milestones [23]. Similarly, there is evidence to show that  
11 parents who frequently use digital media devices to calm upset children lead to increase concerns  
12 in social-emotional development in toddlers [24]. Few studies observed increased ADHD  
13 problems in children with excessive TV use [25,26], while the cognitive development of children  
14 was found to improve when screen time was reduced to less than 2 hours per day [27]. It was  
15 reported that the use of electronic media in preschool-age children was associated with behavioral  
16 difficulties over time [28]. Hyperactivity or inattention problems were associated with baseline  
17 use of mobile phones, while emotional and conduct problems were associated with internet or  
18 computer usage [28].  
19  
20  
21  
22  
23  
24  
25  
26  
27  
28  
29  
30

31 To the best of our knowledge, this is the first study to examine gadget addiction and its association  
32 with cognitive function in children in Bangladesh, using the PMUM–SF and PedsQL™ Cognitive  
33 Functioning Scales. The questionnaire used in this study were developed from these validated  
34 scales, thus, enhancing the strength of our research. Another strength of this study is the large  
35 sample size used which allows for greater precision and generalizability of the findings. One of  
36 the limitations of this study is that we could only present the association between gadget addiction  
37 and cognitive function, rather than causality due to our research methodology. Recall and social  
38 desirability bias are likely to have occurred since part of the data was drawn from parental reports.  
39 Future research is needed to establish cause and effect on this topic and therefore, draw definitive  
40 conclusions.  
41  
42  
43  
44  
45  
46  
47  
48

49 We conclude that there is a positive correlation between gadget addiction and poor cognitive  
50 function among children who use digital devices frequently. Therefore, interventions and  
51 education programs should be developed to increase public awareness of harmful gadget  
52 addictions in children. Screening of gadget addictions among school-going children should be  
53  
54  
55  
56  
57  
58  
59  
60

1  
2  
3 considered in future interventions as well as policies on daily recommended time limits of digital  
4 media device usage in children.  
5

## 6 7 **Declarations**

### 8 9 **Ethics approval and consent to participate**

10  
11 Ethical approval for this study was obtained from the Institutional Review Board, North South  
12 University (Approval no-2022/0R-NSU/IRB/1005). All the participants were explained in detail  
13 about the aims and process of this study and informed consent was taken before data collection.  
14  
15  
16

### 17 18 **Consent for publication**

19  
20 Not applicable  
21  
22

### 23 24 **Availability of data and materials**

25 The datasets used and/or analysed during the current study are available from the corresponding  
26 author upon reasonable request.  
27  
28

### 29 30 **Competing interests**

31  
32 The authors declare that they have no competing interests  
33

### 34 35 **Funding**

36  
37 The authors did not receive any funding.  
38

### 39 40 **Authors' contributions**

41 Mowshomi Mannan Liza conceived the need for the survey, participated in its design, and  
42 contributed to the interpretation of the results. Simanta Roy, Sreshtha Chowdhury, participated in  
43 the design. Mowshomi Mannan Liza, Mohammad Azmain Iktidar, Simanta Roy participated in  
44 data analysis of the study. Musa Jallow, Sreshtha Chowdhury, Mohammad Azmain Iktidar,  
45 Tarannum Mahmud, and Mustari Nailah Tabassum collaborated in data collection and writing up  
46 the manuscript. All authors read and approved the final manuscript.  
47  
48  
49  
50

### 51 52 **Acknowledgments**

1  
2  
3  
4  
5  
6  
7  
8  
9  
10  
11  
12  
13  
14  
15  
16  
17  
18  
19  
20  
21  
22  
23  
24  
25  
26  
27  
28  
29  
30  
31  
32  
33  
34  
35  
36  
37  
38  
39  
40  
41  
42  
43  
44  
45  
46  
47  
48  
49  
50  
51  
52  
53  
54  
55  
56  
57  
58  
59  
60

The authors would like to thank Dr Azaz bin sharif (North South University), Dr. Sanjana Zaman (North South University), for the assistance and time with this article.

Confidential: For Review Only

## Reference

- 1 Jamir L, Duggal M, Nehra R, *et al.* Epidemiology of technology addiction among school students in rural India. *Asian J Psychiatr* 2019;**40**:30–8. doi:10.1016/j.ajp.2019.01.009
- 2 Sohn S, Rees P, Wildridge B, *et al.* Prevalence of problematic smartphone usage and associated mental health outcomes amongst children and young people: a systematic review, meta-analysis and GRADE of the evidence. *BMC Psychiatry* 2019;**19**. doi:10.1186/S12888-019-2350-X
- 3 Rashid SMM, Mawah J, Banik E, *et al.* Prevalence and impact of the use of electronic gadgets on the health of children in secondary schools in Bangladesh: A cross-sectional study. *Heal Sci Reports* 2021;**4**:1–9. doi:10.1002/hsr2.388
- 4 Khalil S, Kumari P, Alim F, *et al.* A Cross-Sectional Study of Electronic Media Influence on Eating Habits among School Going Adolescents. *J Evol Med Dent Sci* 2020;**9**:3452–6. doi:10.14260/jemds/2020/756
- 5 Handayani OWK, Yuniastuti A, Abudu KO, *et al.* Gadget Addiction and The Effect of Sleep Habit, Stress, Physical Activity to Obesity. *Malaysian J. Public Heal. Med.* 2021;**21**:1–8. doi:10.37268/MJPHM/VOL.21/NO.1/ART.272
- 6 Seo DG, Park Y, Kim MK, *et al.* Mobile phone dependency and its impacts on adolescents' social and academic behaviors. *Comput Human Behav* 2016;**63**:282–92. doi:10.1016/j.chb.2016.05.026
- 7 Jacobsen WC, Forste R. The wired generation: Academic and social outcomes of electronic media use among university students. *Cyberpsychology, Behav Soc Netw* 2011;**14**:275–80. doi:10.1089/cyber.2010.0135
- 8 Keough N. *Encyclopedia of Quality of Life and Well-Being Research.* 2014. doi:10.1007/978-94-007-0753-5
- 9 Brand M, Laier C, Young KS. Internet addiction: Coping styles, expectancies, and treatment implications. *Front Psychol* 2014;**5**:1–14. doi:10.3389/fpsyg.2014.01256
- 10 Hong W, Liu R De, Ding Y, *et al.* Mobile phone addiction and cognitive failures in daily



- 1  
2  
3 life: The mediating roles of sleep duration and quality and the moderating role of trait self-  
4 regulation. *Addict Behav* 2020;**107**:106383. doi:10.1016/j.addbeh.2020.106383  
5  
6  
7  
8 11 Ghosh S, Masud S, Tabassum M, *et al.* Effect of Dietary Intake and Socio-Economic Factor  
9 on Nutritional Status of Primary School Going Children : a Cross-Sectional Study in old  
10 Dhaka. 2018;**5**:93–100.  
11  
12  
13 12 Goh WWL, Bay S, Chen VHH. Young school children’s use of digital devices and parental  
14 rules. *Telemat Informatics* 2015;**32**:787–95. doi:10.1016/j.tele.2015.04.002  
15  
16  
17 13 Varni JW, Sherman SA, Burwinkle TM, *et al.* The PedsQL™ Family Impact Module:  
18 Preliminary reliability and validity. *Health Qual Life Outcomes* 2004;**2**:1–6.  
19 doi:10.1186/1477-7525-2-55  
20  
21  
22  
23 14 Meng SQ, Cheng JL, Li YY, *et al.* Global prevalence of digital addiction in general  
24 population: A systematic review and meta-analysis. *Clin Psychol Rev* 2022;**92**:102128.  
25 doi:10.1016/J.CPR.2022.102128  
26  
27  
28  
29 15 Yen C, Tang T, Yen J, *et al.* Symptoms of problematic cellular phone use, functional  
30 impairment and its association with depression among adolescents in Southern Taiwan.  
31 *Elsevier*  
32  
33  
34  
35 16 Domoff SE, Harrison K, Gearhardt AN, *et al.* Development and validation of the  
36 problematic media use measure: A parent report measure of screen media ‘addiction’ in  
37 children. *Psychol Pop Media Cult* 2019;**8**:2–11. doi:10.1037/PPM0000163  
38  
39  
40  
41 17 Hadi AA, Roslan SR. Tools to Assess Screen-related Dependency in Children: a Narrative  
42 Review of Validated Questionnaires. *Malaysian J Med Heal Sci* 2022;**18**:2636–9346.  
43  
44  
45 18 Anitha FS, Narasimhan U, Janakiraman A, *et al.* Association of digital media exposure and  
46 addiction with child development and behavior: A cross-sectional study. *Ind Psychiatry J*  
47 2021;**30**:265. doi:10.4103/IPJ.IPJ\_157\_20  
48  
49  
50  
51 19 Networking OF-TP of S, 2016 undefined. Problem mobile phone use in spanish and british  
52 adolescents: First steps towards a cross-cultural research in Europe. *research.monash.edu*  
53  
54  
55 20 Beutel ME, Brähler E, Glaesmer H, *et al.* Regular and problematic leisure-time Internet use  
56  
57  
58  
59  
60

- 1  
2  
3 in the community: results from a German population-based survey. *Cyberpsychol Behav*  
4 *Soc Netw* 2011;**14**:291–6. doi:10.1089/CYBER.2010.0199  
5  
6  
7 21 Alaettin U, Mustafa T, Didem A, *et al.* Internet Addiction and Sleeping Quality among  
8 College Students in West Turkey. *Res J Educ Sci* 2016;**4**:1–8.  
9  
10  
11 22 Varni JW, Junger KF, Kellermann T, *et al.* PedsQL™ Cognitive Functioning Scale in youth  
12 with epilepsy: Reliability and validity. *Epilepsy Behav* 2020;**103**:106850.  
13 doi:10.1016/J.YEBEH.2019.106850  
14  
15  
16  
17 23 Lin L, Cherg R, Chen Y, *et al.* Effects of television exposure on developmental skills  
18 among young children. *Elsevier*  
19  
20  
21 24 Radesky JS, Peacock-Chambers E, Zuckerman B, *et al.* Use of mobile technology to calm  
22 upset children: Associations with social-emotional development. *jamanetwork.com*  
23 2016;**170**:397. doi:10.1001/jamapediatrics.2015.4260  
24  
25  
26  
27 25 Özmert E, Toyran M, & KY-A of P, *et al.* Behavioral correlates of television viewing in  
28 primary school children evaluated by the child behavior checklist. *jamanetwork.com*  
29  
30  
31 26 Miller C, Marks D, ... SM-J of pediatric, *et al.* Brief report: Television viewing and risk for  
32 attention problems in preschool children. *academic.oup.com*  
33  
34  
35  
36 27 Wise J. Screen time: two hour daily limit would improve children's cognition, study finds.  
37 2018.  
38  
39  
40 28 Poulain T, Vogel M, Neef M, *et al.* Reciprocal associations between electronic media use  
41 and behavioral difficulties in preschoolers. *mdpi.com* doi:10.3390/ijerph15040814  
42  
43  
44  
45  
46  
47  
48  
49  
50  
51  
52  
53  
54  
55  
56  
57  
58  
59  
60

**Table 2: Background information of study participants (n=769)**

| Variables                                    | Frequency  | Percentage |
|----------------------------------------------|------------|------------|
| <b>Age (in years), mean±SD</b>               | 12.02±1.80 |            |
| <b>Gender</b>                                |            |            |
| Male                                         | 251        | 32.69      |
| Female                                       | 518        | 67.31      |
| <b>Residence</b>                             |            |            |
| Rural                                        | 296        | 38.52      |
| Urban                                        | 473        | 61.48      |
| <b>Type of family</b>                        |            |            |
| Nuclear                                      | 597        | 77.59      |
| Joint                                        | 172        | 22.41      |
| <b>Birth Order</b>                           |            |            |
| 1 <sup>st</sup> or second                    | 569        | 74.01      |
| Third or more than third                     | 200        | 25.99      |
| <b>Monthly family income (in BDT)</b>        |            |            |
| Less than 15,000                             | 329        | 42.77      |
| More than or Equal 15,000                    | 440        | 57.23      |
| <b>Maximum years of parental education</b>   |            |            |
| Less or Equal to 10 years                    | 404        | 52.5       |
| More than 10 years                           | 365        | 47.5       |
| <b>Mode of delivery</b>                      |            |            |
| Do not know                                  | 45         | 5.86       |
| NVD by others                                | 183        | 23.8       |
| NVD by Doctor                                | 339        | 44.02      |
| C/S                                          | 202        | 26.32      |
| <b>EPI vaccination</b>                       |            |            |
| No                                           | 73         | 9.44       |
| Yes                                          | 696        | 90.56      |
| <b>Duration of breastfeeding (in months)</b> |            |            |
| < 6 months                                   | 83         | 10.78      |
| 6-12 months                                  | 123        | 15.93      |
| 12-24 months                                 | 196        | 25.49      |
| >24 months                                   | 368        | 47.79      |
| <b>Deworming</b>                             |            |            |
| Never                                        | 22         | 2.82       |
| Occasionally                                 | 377        | 49.08      |
| Regularly (3 monthly)                        | 370        | 48.1       |

|                         |     |       |
|-------------------------|-----|-------|
| <b>Gadget Addiction</b> |     |       |
| Low Gadget Addiction    | 408 | 53.06 |
| High Gadget Addiction   | 361 | 46.94 |

SD, Standard Deviation; BDT, Bangladeshi Taka, NVD, Normal Vaginal Delivery

**Table 3: Cognitive function of the study participants and associated factors (n=769)**

| Variables                                  | AOR       | p-value | Upper bound of 95%CI | Lower bound of 95% CI |
|--------------------------------------------|-----------|---------|----------------------|-----------------------|
| <b>Gadget Addiction</b>                    |           |         |                      |                       |
| Low Gadget Addiction                       | Reference |         |                      |                       |
| High Gadget Addiction                      | 0.44      | <0.001  | 0.29                 | 0.66                  |
| <b>Age (in years)</b>                      |           |         |                      |                       |
| Age (in years)                             | 1.05      | 0.39    | 0.94                 | 1.19                  |
| <b>Gender</b>                              |           |         |                      |                       |
| Male                                       | Reference |         |                      |                       |
| Female                                     | 1.10      | 0.68    | 0.70                 | 1.72                  |
| <b>Residence</b>                           |           |         |                      |                       |
| Rural                                      | Reference |         |                      |                       |
| Urban                                      | 0.93      | 0.80    | 0.53                 | 1.63                  |
| <b>Type of family</b>                      |           |         |                      |                       |
| Nuclear                                    | Reference |         |                      |                       |
| Joint                                      | 0.98      | 0.93    | 0.61                 | 1.58                  |
| <b>Birth Order</b>                         |           |         |                      |                       |
| <=2                                        | Reference |         |                      |                       |
| >2                                         | 0.86      | 0.53    | 0.54                 | 1.37                  |
| <b>Monthly family income (in BDT)</b>      |           |         |                      |                       |
| <15,000                                    | Reference |         |                      |                       |
| >=15,000                                   | 1.01      | 0.98    | 0.62                 | 1.64                  |
| <b>Maximum years of parental education</b> |           |         |                      |                       |
| <=10                                       | Reference |         |                      |                       |
| >10                                        | 0.76      | 0.30    | 0.46                 | 1.27                  |
| <b>Mode of delivery</b>                    |           |         |                      |                       |
| Do not know                                | Reference |         |                      |                       |
| NVD by others                              | 1.11      | 0.87    | 0.31                 | 3.98                  |
| NVD by Doctor                              | 1.56      | 0.49    | 0.45                 | 5.40                  |
| C/S                                        | 1.26      | 0.73    | 0.35                 | 4.50                  |
| <b>EPI vaccination</b>                     |           |         |                      |                       |
| No                                         | Reference |         |                      |                       |
| Yes                                        | 1.11      | 0.82    | 0.46                 | 2.68                  |

| <b>Duration of breastfeeding (in months)</b> |           |             |      |  |      |
|----------------------------------------------|-----------|-------------|------|--|------|
| < 6                                          | Reference |             |      |  |      |
| 6-12                                         | 2.45      | <b>0.03</b> | 1.11 |  | 5.38 |
| 12-24                                        | 2.04      | <b>0.05</b> | 0.99 |  | 4.20 |
| >24                                          | 2.32      | <b>0.02</b> | 1.18 |  | 4.60 |
| <b>Deworming</b>                             |           |             |      |  |      |
| Never                                        | Reference |             |      |  |      |
| Occasionally                                 | 0.67      | 0.53        | 0.20 |  | 2.30 |
| Regularly (3 monthly)                        | 0.94      | 0.92        | 0.27 |  | 3.25 |

AOR, adjusted odds ratio; CI, confidence interval  
p-value <0.05 is in bold

**Table 4: Problematic Media Use Measure Questionnaire and responses of the participant**

| <b>Digital Addiction Question</b>                                                                       | <b>Never</b>   | <b>Seldom</b>  | <b>Sometimes</b> | <b>Frequently</b> | <b>Always</b>  | <b>Mean score</b> |
|---------------------------------------------------------------------------------------------------------|----------------|----------------|------------------|-------------------|----------------|-------------------|
|                                                                                                         | <b>Score 1</b> | <b>Score 2</b> | <b>Score 3</b>   | <b>Score 4</b>    | <b>Score 5</b> |                   |
| It is hard for my child to stop using screen media                                                      | 47.61          | 11.04          | 33.99            | 2.09              | 5.28           | 2.06              |
| Screen media is the only thing that seems to motivate my child                                          | 51.05          | 11.4           | 26.39            | 3.22              | 7.93           | 2.05              |
| Screen media is all that my child seems to think about                                                  | 54.94          | 8.77           | 27.16            | 3.7               | 5.43           | 1.96              |
| My child's screen media use interferes with family activities                                           | 47.06          | 11.03          | 31.86            | 2.94              | 7.11           | 2.12              |
| My child's screen media use causes problems for the family                                              | 67.37          | 8.78           | 18.54            | 1.48              | 3.83           | 1.66              |
| My child becomes frustrated when he/she cannot use screen media                                         | 64.62          | 10.57          | 19.78            | 1.97              | 3.07           | 1.68              |
| The amount of time my child wants to use screen media keeps increasing                                  | 61.83          | 13.14          | 17.97            | 4.09              | 2.97           | 1.73              |
| My child sneaks using screen media                                                                      | 75.65          | 7.42           | 14.34            | 1.24              | 1.36           | 1.45              |
| When my child has had a bad day, screen media seems to be the only thing that helps him/her feel better | 52.58          | 9.83           | 29.36            | 1.84              | 6.39           | 2.00              |

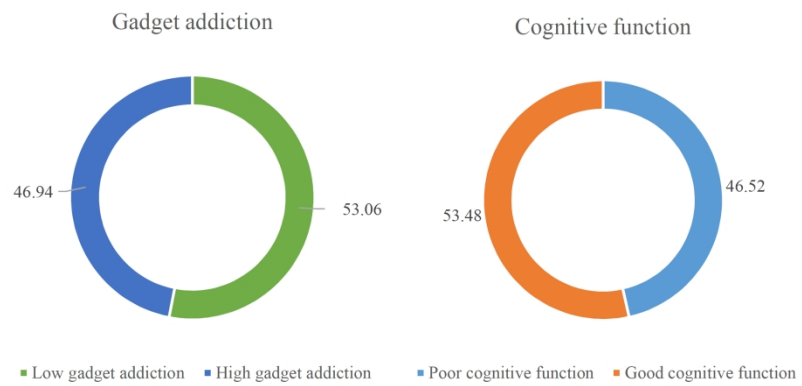

Prevalence of gadget addiction and cognitive function among school-going children (n=769)

968x437mm (72 x 72 DPI)

# BMJ Paediatrics Open

## Gadget Addiction among School Going Children and its Association to Cognitive Function: A Cross-sectional Survey from Bangladesh

|                               |                                                                                                                                                                                                                                                                                                                                                                                                                                                                                                                                                                                                                                                              |
|-------------------------------|--------------------------------------------------------------------------------------------------------------------------------------------------------------------------------------------------------------------------------------------------------------------------------------------------------------------------------------------------------------------------------------------------------------------------------------------------------------------------------------------------------------------------------------------------------------------------------------------------------------------------------------------------------------|
| Journal:                      | <i>BMJ Paediatrics Open</i>                                                                                                                                                                                                                                                                                                                                                                                                                                                                                                                                                                                                                                  |
| Manuscript ID                 | bmjpo-2022-001759.R1                                                                                                                                                                                                                                                                                                                                                                                                                                                                                                                                                                                                                                         |
| Article Type:                 | Original research                                                                                                                                                                                                                                                                                                                                                                                                                                                                                                                                                                                                                                            |
| Date Submitted by the Author: | 16-Jan-2023                                                                                                                                                                                                                                                                                                                                                                                                                                                                                                                                                                                                                                                  |
| Complete List of Authors:     | Liza, Mowshomi Mannan; North South University, Department of Public Health; School of Research<br>Iktidar, Mohammad Azmain; North South University, Department of Public Health; School of Research<br>Roy, Simanta; North South University, Department of Public Health; School of Research<br>Jallow, Musa; Medical Research Council Unit The Gambia at the London School of Hygiene and Tropical Medicine<br>Chowdhury, Sreshtha; North South University, Department of Public Health; School of Research<br>Tabassum, Mustari Nailah; Chittagong Medical College; School of Research<br>Mahmud, Tarannum; Chittagong Medical College; School of Research |
| Keywords:                     | Child Psychiatry, Epidemiology                                                                                                                                                                                                                                                                                                                                                                                                                                                                                                                                                                                                                               |
|                               |                                                                                                                                                                                                                                                                                                                                                                                                                                                                                                                                                                                                                                                              |

SCHOLARONE™  
Manuscripts



I, the Submitting Author has the right to grant and does grant on behalf of all authors of the Work (as defined in the below author licence), an exclusive licence and/or a non-exclusive licence for contributions from authors who are: i) UK Crown employees; ii) where BMJ has agreed a CC-BY licence shall apply, and/or iii) in accordance with the terms applicable for US Federal Government officers or employees acting as part of their official duties; on a worldwide, perpetual, irrevocable, royalty-free basis to BMJ Publishing Group Ltd ("BMJ") its licensees and where the relevant Journal is co-owned by BMJ to the co-owners of the Journal, to publish the Work in this journal and any other BMJ products and to exploit all rights, as set out in our [licence](#).

The Submitting Author accepts and understands that any supply made under these terms is made by BMJ to the Submitting Author unless you are acting as an employee on behalf of your employer or a postgraduate student of an affiliated institution which is paying any applicable article publishing charge ("APC") for Open Access articles. Where the Submitting Author wishes to make the Work available on an Open Access basis (and intends to pay the relevant APC), the terms of reuse of such Open Access shall be governed by a Creative Commons licence – details of these licences and which [Creative Commons](#) licence will apply to this Work are set out in our licence referred to above.

Other than as permitted in any relevant BMJ Author's Self Archiving Policies, I confirm this Work has not been accepted for publication elsewhere, is not being considered for publication elsewhere and does not duplicate material already published. I confirm all authors consent to publication of this Work and authorise the granting of this licence.



1  
2  
3 **Title: Gadget Addiction among School Going Children and its Association to Cognitive**  
4 **Function: A Cross-sectional Survey from Bangladesh**  
5

6  
7 **Mowshomi Mannan Liza**<sup>1</sup>, Mohammad Azmain Iktidar<sup>1\*</sup>, Simanta Roy<sup>1</sup>, Musa Jallow<sup>3</sup>, Sreshtha  
8 Chowdhury<sup>1</sup>, Mustari Nailah Tabassum<sup>2</sup>, Tarannum Mahmud<sup>2</sup>  
9

10  
11 <sup>1</sup> Department of Public Health, North South University, Dhaka 1229, Bangladesh.

12  
13 <sup>2</sup> Chittagong Medical College, Chattagram, Dhaka.

14  
15 <sup>3</sup> Medical Research Council Unit the Gambia at London School of Hygiene and Tropical  
16 Medicine  
17

18  
19  
20 **\*Corresponding author**

21 Mohammad Azmain Iktidar

22 MBBS, MPH

23 Department of Public Health,

24 North South University, Dhaka 1229, Bangladesh.

25 Email: [sazmain@gmail.com](mailto:sazmain@gmail.com)

26 ORCID: <https://orcid.org/0000-0002-9073-5451>  
27  
28  
29

30  
31  
32  
33  
34  
35 **Word Count**

36 2352

37  
38  
39 **Reference Count**

40 29  
41  
42  
43  
44  
45  
46  
47  
48  
49  
50  
51  
52  
53  
54  
55  
56  
57

## Abstract

### Background

People are becoming more dependent on technology than ever before. Today's children and adults are heavily plugged into electronics, which raises concerns for their physical and cognitive development. This cross-sectional study was conducted to assess the relationship between media usage and cognitive function among school-going children.

### Methods

This cross-sectional study was conducted in 11 schools in three of Bangladesh's most populous metropolitan areas: Dhaka, Chattogram, and Cumilla. A semi-structured questionnaire with three sections was utilized to obtain data from the respondents: (1) Background Information, (2) PedsQL™ Cognitive Functioning Scale, and (3) Problematic Media Use Measure Short Form. Stata (v.16) was used for statistical analysis. Mean and standard deviation were used to summarize quantitative variables. Qualitative variables were summarized using frequency and percentage. The chi-square test was used to explore bivariate association between categorical variables, and a binary logistic regression model was fit to investigate the factors associated with the cognitive function of the study participants after adjusting for confounders.

### Results

The mean age of total of 769 participants was  $12.0 \pm 1.8$  years, and the majority (67.31%) were females. The prevalence of high gadget addiction and poor cognitive function was 46.9% and 46.5%, respectively, among the participants. After adjusting the factors, this study found a statistically significant relationship (AOR: 0.4, CI: 0.3 to 0.7) between gadget addiction and cognitive function. Besides, the duration of breastfeeding was a predictor of cognitive function as well.

### Conclusion

This study found digital media addiction as a predictor of decreased cognitive performance in children who use digital gadgets regularly. Although the cross-sectional design of the study precludes causal relationships from being determined, the study finding deserves further examination via longitudinal research.

**Keywords:** Digital, Gadget, Addiction, Cognitive function, School-going children.

### WHAT IS ALREADY KNOWN ON THIS TOPIC?

- School age is a time of rapid physical and mental growth for children.
- Both children and adults are excessively immersed in electronic gadgets in today's times
- Digital addiction has a detrimental effect on 'students' performance in the classroom.
- Boys have a higher score of addiction to gadgets (66.3%).

### WHAT THIS STUDY ADDS

This study found a significant proportion of school-going children are addicted to digital gadgets. Gadget addiction has a statistically significant relationship with the cognitive function of school-going children.

### HOW THIS STUDY MIGHT AFFECT RESEARCH, PRACTICE, OR POLICY

This study recommends regular screening of gadget addictions among school-going children and future interventions and policies on daily recommended time limits of digital media device usage in children.

## Introduction

Around the world, people are increasing their reliance on technology devices at a rate that has never been seen before [1]. Not only adults but also children are excessively immersed in electronic gadgets in today's times, which generates issues and worries regarding the effects these devices have on children in terms of their physical and cognitive development [2,3]. Regarding the situation in Asia, a prior study that was carried out in six Asian nations concluded that children aged from 12 to 18 years held ownership of smartphones at a rate of 62% overall [3].

Numerous developments have taken place in the public sphere of the modern period, leading to an explosion of new forms of data transmission, social interaction, and leisure time activities. As technology continues to grow on a global scale, it is nearly impossible to live without any digital screen [4]. Technological progress brings about inevitable lifestyle changes, particularly in children. These changes include the habit of playing with gadgets, eating habits, physical activity levels, and the impacts of these changes [5]. There are identified benefits of digital device use, such as helping children acquire new vocabulary, languages, and stay engaged in the classroom [6]. However, the possible negative impact of digital device use and its problematic usage is also common. A study has shown that digital addiction has a detrimental effect on 'students' performance in the classroom [7]. Children who spend an excessive amount of time in front of screens may have decreased levels of productivity [3]. Above mentioned studies indicate that there are a variety of advantages as well as drawbacks associated with the use of the various forms of the digital screen.

A cognitive function is any psychological process that is involved in the process of acquiring knowledge, the manipulation of information, or the logical derivation of conclusions [8]. The capabilities of perceiving, remembering, learning, paying attention, deliberating, and communicating are all included in the cognitive processes [8]. People who utilize digital screens for prolonged periods have been reported to have impaired cognitive regulation and cognitive inflexibility [9]. According to the findings of another study, digital addiction is connected with an increased number of reported cognitive failures [10].

School age is a time of rapid physical and mental growth for children [11]. There are increasing concerns about the effects of children's excessive screen usage on their growth and development [12]. According to the results of a survey, around two-thirds of students use the digital screen while

1  
2  
3 they should be paying attention in class, studying, or completing assignments [7]. The distraction  
4 that is resulted from this multitasking is one of the factors that has been proven to have a negative  
5 impact on 'students' academic performance [7]. There are limited evidences of digital addiction  
6 among children and its correlates in this geographic area. Therefore, this cross-sectional study was  
7 carried out to determine the extent of media use, and it's association with cognitive function  
8 among school-going children in the study region.  
9  
10  
11  
12  
13  
14  
15  
16  
17  
18  
19  
20  
21  
22  
23  
24  
25  
26  
27  
28  
29  
30  
31  
32  
33  
34  
35  
36  
37  
38  
39  
40  
41  
42  
43  
44  
45  
46  
47  
48  
49  
50  
51  
52  
53  
54  
55  
56  
57

## Method

### Study design, setting, and sample

This cross-sectional study was carried out among children ages 8 to 14 enrolled in grades 4 to 7 at five private schools, five public schools, and one madrasah (a specially adapted institution for Islamic education and culture) in Bangladesh. The study locations were chosen using convenient sampling. A printed questionnaire with instructions was used to obtain information from the parent, while trained volunteers performed face-to-face interviews with the participant.

Participants in the selected schools were sent informational pamphlets, parental consent forms, and questionnaires. In addition, the pamphlets included a contact number for any more inquiries. Cognitive function assessment interviews were conducted with (n = 769) children who provided written parental consent and completed the questionnaire within one week. After receiving ethical permission (Approval no-2022/0R-NSU/IRB/1005) from the Institutional Review Board of North South University, data were gathered from January through May of 2022.

### Measures

A semi-structured questionnaire with three sections was used for data collection. Section one included questions on sociodemographic factors (age, gender, residence, family type, family income, and parental education status), birth order (the order in which the child is born in comparison to other sibling), method of delivery (how the child was given birth: Normal vaginal delivery or Cesarean Section), Expanded Program on Immunization (EPI) vaccination status (If the child received all vaccination according to the EPI schedule), duration of breastfeeding (For how long the child was breastfed), and deworming status (The interval at which the child received deworming medication: Never, occasionally or regularly). Sections two and three included two validated questionnaires (PedsQL™ Cognitive Functioning Scale and Problematic Media Use Measure Short Form) for measuring cognitive function and gadget addiction, respectively. The parents received sections one and three with precise instructions for completion. The remainder of the questionnaire (section 2: PedsQL™ Cognitive Functioning Scale) was completed by a trained volunteer after the participant's face-to-face interview.

\*\*\*\*\*

### **PedsQL™ Cognitive Functioning Scale**

The PedsQL™ Cognitive Functioning Scale consists of six questions ("It is hard for me to keep my attention on things;" "It is hard for me to remember what people tell me;" "It is hard for me to remember what I just heard;" "It is hard for me to think quickly;" "I have trouble remembering what I was just thinking;" "I have trouble remembering more than one thing at a time."). This scale was developed through focus group discussions, cognitive interviews, pre-testing, and field-testing measurement development techniques [13]. A five-point Likert scale was used to assess this scale, with 0 denoting never, 1 denoting nearly never, 2 denoting sometimes, 3 denoting often, and 4 denoting almost always. All responses were reverse-scored and then linearly translated to a 0-100 scale (0 = 100, 1 = 75, 2 = 50, 3 = 25, 4 = 0), in accordance with established scoring protocols. Any score below the mean was considered as poor cognitive functioning and higher scores indicated higher functioning.

### **Problematic Media Use Measure Short Form**

The Problematic Media Use Measure Short Form (PMUM–SF) was used to determine the level of screen addiction among all of the children in our study cohort. It includes nine components. Each answer was based on a five-point Likert scale: (1) never, (2) seldom, (3) sometimes, (4) often, and (5) always. Children who scored three or higher on at least five questions were deemed to have a high level of device addiction.

### **Pretesting**

A pretesting was done on 20 participants from Government and Private schools to check the feasibility and reliability of the study. Necessary modifications were made to simplify the data collection without affecting the data quality. The inclusion of a helpline number in leaflets was considered upon the suggestions of the pilot participants.

### **Statistical analysis**

All analyses were performed using Stata (version 16). Descriptive statistics were calculated as mean and standard deviations for quantitative variables or frequency and relative frequency for categorical variables. The bivariate association of two categorical variables was explored using the chi-squared ( $\chi^2$ ) test. A binary logistic regression model was fitted to assess the association

1  
2  
3 between cognitive function and gadget addiction. Variables with a p-value of  $\leq 0.2$  in the bivariate  
4 analysis entered in the multivariate model in a forward stepwise selection method. A two-tailed p-  
5 value of  $< 0.05$  was considered statistically significant.  
6  
7

### 8 9 **Public Involvement**

10 Members of the public were involved in several stages of the study including design and conduct.  
11 We received input from children and their parents and implemented them in our study design. We  
12 intend to disseminate the main results to study participants and will seek public involvement in the  
13 development of an appropriate method of dissemination.  
14  
15  
16  
17  
18  
19  
20  
21  
22  
23  
24  
25  
26  
27  
28  
29  
30  
31  
32  
33  
34  
35  
36  
37  
38  
39  
40  
41  
42  
43  
44  
45  
46  
47  
48  
49  
50  
51  
52  
53  
54  
55  
56  
57



## Result

Of the 836 questionnaires and consent forms provided to the participants, 67 were ineligible (30 did not meet inclusion criteria and 37 did not consent), resulting in 769 potential responders. 769 responses out of 836 amounted to a response rate of 91.9%.

Background information of the study participants are presented in **Table 1**. Among the 769 participants, 67.3% were female and hailed from urban areas. About 78% of the participants were from nuclear families, and most of the participants' birth orders were second or more. Most of the participants' family income was in between 10,000 to 20,000 BDT (Bangladeshi taka) (42.4%). Regarding parental education, 40.9% of parents had 8-12 years of schooling. In terms of birth, 26.3% of participants' modes of delivery were by Cesarean Section, and 67.8% were Normal Vaginal Delivery. Most of the participants (90.6%) were EPI (Expanded Program on Immunization) vaccinated. 10.8% of participants' duration of breastfeeding was less than 6 months, whereas 47.8% of participants were more than 24 months. About 3% of participants were never dewormed, whereas 49.08% were occasionally and 48.1% were regularly. The prevalence of high gadget addiction and poor cognitive function were 46.9% and 46.5% respectively among the participants (**Figure 1**).

### Table 1

### Figure 1

**Table 2** includes all the potential variables and demonstrates the adjusted result. After adjusting for age, gender, residence, family type, birth order, family income, parental education, mode of delivery, EPI vaccination status, duration of breastfeeding and deworming status, participants with high gadget addiction had 56% less chance of good cognitive function than those with low gadget addiction. Also, participants whose duration of breastfeeding was 6-12 months (AOR: 2.5, 95% CI: 1.1 to 5.4, p-value: 0.02), 12-24 months (AOR: 2.0, 95% CI: 1.0 to 4.2, p-value: 0.05), and more than 24 months (AOR: 2.4, 95% CI: 1.0 to 4.7, p-value: 0.01) had a higher chance of having good cognitive function than those who were breastfed for less than six months. Responses regarding the PMUM questionnaire are presented in **Table 3**.

1  
2  
3  
4  
5  
6  
7  
8  
9  
10  
11  
12  
13  
14  
15  
16  
17  
18  
19  
20  
21  
22  
23  
24  
25  
26  
27  
28  
29  
30  
31  
32  
33  
34  
35  
36  
37  
38  
39  
40  
41  
42  
43  
44  
45  
46  
47  
48  
49  
50  
51  
52  
53  
54  
55  
56  
57  
58  
59  
60

**Table 2**

**Table 3**

Confidential: For Review Only

## Discussion

The objective of this study was to determine the prevalence of gadget addiction and its association with cognitive functions among school-going children in Bangladesh. Using a semi-structured questionnaire data were collected on background information, and data estimating cognitive functions and gadget addictions via the PedsQL™ Cognitive Functioning Scale and PMUM–SF respectively. In this study, a high gadget addiction score (46.9%) was found in the participants; this result is similar to other studies reporting the growing prevalence of gadget addiction in different parts of the world. Similarly, previous research consisting of two systematic reviews and meta-analysis [2,14] confirm the increasing prevalence trend of gadget addiction over time in children and children. An Indian study among school-going children, where 57.55% were female, found that 10.69% of technology users were addicted, with 8.91% addicted solely to their phones [15].

The PMUM–SF scale is a validated and reliable tool used to estimate screen media addiction in children by measuring child screen time and psychosocial functioning [16–18]. The high gadget addiction score estimated by PMUM was found to be across all age groups, and of the total participants in this study, the median age was 12.0 years with females being the majority (67%). This is in contrast to a study conducted in India, which reported boys as having a higher gadget addiction score (66.3%) because they had longer screen time than girls [19]. Other studies suggest that the prevalence of problematic media use or gadget addiction among children and young adults often varies (ranging from 5-50%) [16,20].

Although the significance could not be established, it was observed that majority of the participants were from urban areas, belonged to nuclear families, had family income  $\geq 15,000$  BDT/month, and had parents with some level of education. These elements could potentially be indicative of higher socioeconomic status and therefore, children born from such families are more at risk of excessive screen exposure and gadget addiction. Few studies have demonstrated the link between high family income and screen or internet addiction, thus confirming our theory [21,22].

Using the PedsQL™ Cognitive Functioning Scale which is a reliable and valid measure of cognitive functioning in children [13,23], we estimated the cognitive function of all participants in the study and determine their association with children with gadget addiction. Overall, it was found that 53.5% of the children had a good cognitive function score, and children identified to have

1  
2  
3 high gadget addiction scores had 57% less chance (AOR:0.4,95% CI:0.30-0.6,  $p<0.001$ ) of having  
4 a good cognitive function compared to those with low gadget addiction. The adjusted logistic  
5 regression analysis showed that as gadget addiction increases the level of poor cognitive function  
6 increases as well. A previous study conducted on children under 12 years of age in India, found  
7 that gadget media addiction has a close association with decreased cognitive function [19]. The  
8 study findings indicated that increased screen time and gadget addiction were significantly  
9 associated with parental concerns in some cognitive elements such as problem-solving,  
10 communication, and personal-social development [19]. Previous research further supports this,  
11 reporting the significant association between increased screen time and delays in cognition,  
12 language, and developmental motor milestones [24]. Similarly, there is evidence to show that  
13 parents who frequently use digital media devices to calm upset children lead to increase concerns  
14 in social-emotional development in toddlers [25]. Few studies observed increased ADHD  
15 problems in children with excessive TV use [26,27], while the cognitive development of children  
16 was found to improve when screen time was reduced to less than 2 hours per day [28]. It was  
17 reported that the use of electronic media in preschool-age children was associated with behavioral  
18 difficulties over time [29]. Hyperactivity or inattention problems were associated with baseline  
19 use of mobile phones, while emotional and conduct problems were associated with internet or  
20 computer usage [29].  
21  
22  
23  
24  
25  
26  
27  
28  
29  
30  
31  
32  
33

34  
35 To the best of our knowledge, this is the first study to examine gadget addiction and its association  
36 with cognitive function in children in Bangladesh, using the PMUM–SF and PedsQL™ Cognitive  
37 Functioning Scales. The measurement of cognitive function may not be accurate considering the  
38 absence of clinical test. Still, the questionnaire used in this study was developed from validated  
39 scales, thus, enhancing the strength of our research. Another strength of this study is the large  
40 sample size used which allows for greater precision and generalizability of the findings. One of  
41 the limitations of this study is that we could only present the association between gadget addiction  
42 and cognitive function, rather than causality due to our research methodology. Due to convenience  
43 sampling methods employed in this study there may be sampling bias, however, we attempted to  
44 minimize this by sampling 769 children from 11 schools in three of Bangladesh's most populous  
45 metropolitan areas of Bangladesh (Dhaka, Chattogram, and Cumilla). Recall and social desirability  
46 bias are likely to have occurred since part of the data was drawn from parental reports. Future  
47  
48  
49  
50  
51  
52  
53  
54  
55  
56  
57

1  
2  
3 research is needed to establish cause and effect on this topic and therefore, draw definitive  
4 conclusions.  
5

6  
7 We conclude that there is a positive association between gadget addiction and poor cognitive  
8 function among children who use digital devices frequently. Therefore, interventions and  
9 education programs should be developed to increase public awareness of harmful gadget  
10 addictions in children. However, additional longitudinal research is required to obtain a clearer  
11 data.  
12  
13  
14  
15

## 16 **Declarations**

### 17 **Ethics approval and consent to participate**

18  
19 Ethical approval for this study was obtained from the Institutional Review Board, North South  
20 University (Approval no-2022/0R-NSU/IRB/1005). All the participants were explained in detail  
21 about the aims and process of this study and informed consent was taken before data collection.  
22  
23  
24  
25

### 26 **Consent for publication**

27  
28 Not applicable  
29

### 30 **Availability of data and materials**

31  
32 The datasets used and/or analysed during the current study are available from the corresponding  
33 author upon reasonable request.  
34  
35  
36  
37

### 38 **Competing interests**

39  
40 The authors declare that they have no competing interests  
41  
42

### 43 **Funding**

44  
45 The authors did not receive any funding.  
46  
47

### 48 **Authors' contributions**

49  
50 Mowshomi Mannan Liza conceived the need for the survey, participated in its design, and  
51 contributed to the interpretation of the results. Simanta Roy, Sreshtha Chowdhury, participated in  
52 the design. Mowshomi Mannan Liza, Mohammad Azmain Iktidar, Simanta Roy participated in  
53 data analysis of the study. Musa Jallow, Sreshtha Chowdhury, Mohammad Azmain Iktidar,  
54  
55  
56  
57

1  
2  
3  
4  
5  
6  
7  
8  
9  
10  
11  
12  
13  
14  
15  
16  
17  
18  
19  
20  
21  
22  
23  
24  
25  
26  
27  
28  
29  
30  
31  
32  
33  
34  
35  
36  
37  
38  
39  
40  
41  
42  
43  
44  
45  
46  
47  
48  
49  
50  
51  
52  
53  
54  
55  
56  
57  
58  
59  
60

Tarannum Mahmud, and Mustari Nailah Tabassum collaborated in data collection and writing up the manuscript. All authors read and approved the final manuscript.

Confidential: For Review Only

### Acknowledgments

The authors would like to thank Dr. Azaz bin sharif (North South University), and Dr. Sanjana Zaman (North South University) for their assistance and time with this article.

Confidential: For Review Only

## Reference

- 1 Jamir L, Duggal M, Nehra R, *et al.* Epidemiology of technology addiction among school students in rural India. *Asian J Psychiatr* 2019;**40**:30–8. doi:10.1016/j.ajp.2019.01.009
- 2 Sohn S, Rees P, Wildridge B, *et al.* Prevalence of problematic smartphone usage and associated mental health outcomes amongst children and young people: a systematic review, meta-analysis and GRADE of the evidence. *BMC Psychiatry* 2019;**19**. doi:10.1186/S12888-019-2350-X
- 3 Rashid SMM, Mawah J, Banik E, *et al.* Prevalence and impact of the use of electronic gadgets on the health of children in secondary schools in Bangladesh: A cross-sectional study. *Heal Sci Reports* 2021;**4**:1–9. doi:10.1002/hsr2.388
- 4 Khalil S, Kumari P, Alim F, *et al.* A Cross-Sectional Study of Electronic Media Influence on Eating Habits among School Going Adolescents. *J Evol Med Dent Sci* 2020;**9**:3452–6. doi:10.14260/jemds/2020/756
- 5 Handayani OWK, Yuniastuti A, Abudu KO, *et al.* Gadget Addiction and The Effect of Sleep Habit, Stress, Physical Activity to Obesity. *Malaysian J. Public Heal. Med.* 2021;**21**:1–8. doi:10.37268/MJPHM/VOL.21/NO.1/ART.272
- 6 Seo DG, Park Y, Kim MK, *et al.* Mobile phone dependency and its impacts on adolescents' social and academic behaviors. *Comput Human Behav* 2016;**63**:282–92. doi:10.1016/j.chb.2016.05.026
- 7 Jacobsen WC, Forste R. The wired generation: Academic and social outcomes of electronic media use among university students. *Cyberpsychology, Behav Soc Netw* 2011;**14**:275–80. doi:10.1089/cyber.2010.0135
- 8 Keough N. *Encyclopedia of Quality of Life and Well-Being Research*. 2014. doi:10.1007/978-94-007-0753-5
- 9 Brand M, Laier C, Young KS. Internet addiction: Coping styles, expectancies, and treatment implications. *Front Psychol* 2014;**5**:1–14. doi:10.3389/fpsyg.2014.01256
- 10 Hong W, Liu R De, Ding Y, *et al.* Mobile phone addiction and cognitive failures in daily



- life: The mediating roles of sleep duration and quality and the moderating role of trait self-regulation. *Addict Behav* 2020;**107**:106383. doi:10.1016/j.addbeh.2020.106383
- 11 Ghosh S, Masud S, Tabassum M, *et al.* Effect of Dietary Intake and Socio-Economic Factor on Nutritional Status of Primary School Going Children : a Cross-Sectional Study in old Dhaka. 2018;**5**:93–100.
- 12 Goh WWL, Bay S, Chen VHH. Young school children’s use of digital devices and parental rules. *Telemat Informatics* 2015;**32**:787–95. doi:10.1016/j.tele.2015.04.002
- 13 Varni JW, Sherman SA, Burwinkle TM, *et al.* The PedsQL™ Family Impact Module: Preliminary reliability and validity. *Health Qual Life Outcomes* 2004;**2**:1–6. doi:10.1186/1477-7525-2-55
- 14 Meng SQ, Cheng JL, Li YY, *et al.* Global prevalence of digital addiction in general population: A systematic review and meta-analysis. *Clin Psychol Rev* 2022;**92**:102128. doi:10.1016/J.CPR.2022.102128
- 15 Amudhan S, Prakasha H, Mahapatra P, *et al.* Technology addiction among school-going adolescents in India: epidemiological analysis from a cluster survey for strengthening adolescent health programs at district level. *J Public Heal (United Kingdom)* 2022;**44**:286–95. doi:10.1093/pubmed/fdaa257
- 16 Yen C, Tang T, Yen J, *et al.* Symptoms of problematic cellular phone use, functional impairment and its association with depression among adolescents in Southern Taiwan. *Elsevier*
- 17 Domoff SE, Harrison K, Gearhardt AN, *et al.* Development and validation of the problematic media use measure: A parent report measure of screen media ‘addiction’ in children. *Psychol Pop Media Cult* 2019;**8**:2–11. doi:10.1037/PPM0000163
- 18 Hadi AA, Roslan SR. Tools to Assess Screen-related Dependency in Children: a Narrative Review of Validated Questionnaires. *Malaysian J Med Heal Sci* 2022;**18**:2636–9346.
- 19 Anitha FS, Narasimhan U, Janakiraman A, *et al.* Association of digital media exposure and addiction with child development and behavior: A cross-sectional study. *Ind Psychiatry J* 2021;**30**:265. doi:10.4103/IPJ.IPJ\_157\_20

- 1  
2  
3 20 Networking OF-TP of S, 2016 undefined. Problem mobile phone use in spanish and  
4 british adolescents: First steps towards a cross-cultural research in Europe.  
5  
6 *research.monash.edu*  
7  
8  
9 21 Beutel ME, Brähler E, Glaesmer H, *et al.* Regular and problematic leisure-time Internet  
10 use in the community: results from a German population-based survey. *Cyberpsychol*  
11 *Behav Soc Netw* 2011;**14**:291–6. doi:10.1089/CYBER.2010.0199  
12  
13  
14 22 Alaettin U, Mustafa T, Didem A, *et al.* Internet Addiction and Sleeping Quality among  
15 College Students in West Turkey. *Res J Educ Sci* 2016;**4**:1–8.  
16  
17  
18 23 Varni JW, Junger KF, Kellermann T, *et al.* PedsQL™ Cognitive Functioning Scale in  
19 youth with epilepsy: Reliability and validity. *Epilepsy Behav* 2020;**103**:106850.  
20 doi:10.1016/J.YEBEH.2019.106850  
21  
22  
23 24 Lin L, Cherng R, Chen Y, *et al.* Effects of television exposure on developmental skills  
25 among young children. *Elsevier*  
26  
27  
28 25 Radesky JS, Peacock-Chambers E, Zuckerman B, *et al.* Use of mobile technology to calm  
29 upset children: Associations with social-emotional development. *jamanetwork.com*  
30 2016;**170**:397. doi:10.1001/jamapediatrics.2015.4260  
31  
32  
33 26 Özmert E, Toyran M, & KY-A of P, *et al.* Behavioral correlates of television viewing in  
34 primary school children evaluated by the child behavior checklist. *jamanetwork.com*  
35  
36  
37 27 Miller C, Marks D, ... SM-J of pediatric, *et al.* Brief report: Television viewing and risk  
38 for attention problems in preschool children. *academic.oup.com*  
39  
40  
41 28 Wise J. Screen time: two hour daily limit would improve children's cognition, study finds.  
42 2018.  
43  
44  
45 29 Poulain T, Vogel M, Neef M, *et al.* Reciprocal associations between electronic media use  
46 and behavioral difficulties in preschoolers. *mdpi.com* doi:10.3390/ijerph15040814  
47  
48  
49  
50  
51  
52  
53  
54  
55  
56  
57

**Table 2: Background information of study participants (n=769)**

| Variables                                    | Frequency | Percentage |
|----------------------------------------------|-----------|------------|
| <b>Age (in years), mean±SD</b>               | 12.0±1.8  |            |
| <b>Gender</b>                                |           |            |
| Male                                         | 251       | 32.7       |
| Female                                       | 518       | 67.3       |
| <b>Residence</b>                             |           |            |
| Rural                                        | 296       | 38.5       |
| Urban                                        | 473       | 61.5       |
| <b>Type of family</b>                        |           |            |
| Nuclear                                      | 597       | 77.6       |
| Joint                                        | 172       | 22.4       |
| <b>Birth Order</b>                           |           |            |
| 1 <sup>st</sup> or second                    | 569       | 74.0       |
| Third or more than third                     | 200       | 25.9       |
| <b>Monthly family income (in BDT)</b>        |           |            |
| Less than 10,000                             | 178       | 23.1       |
| 10,000 to 20,000                             | 326       | 42.4       |
| More than 20,000                             | 265       | 34.4       |
| <b>Maximum years of parental education</b>   |           |            |
| <8                                           | 166       | 21.6       |
| 8 to 12                                      | 314       | 40.9       |
| >12                                          | 288       | 37.5       |
| <b>Mode of delivery</b>                      |           |            |
| Do not know                                  | 45        | 5.9        |
| NVD by others                                | 183       | 23.8       |
| NVD by Doctor                                | 339       | 44.0       |
| C/S                                          | 202       | 26.3       |
| <b>EPI vaccination</b>                       |           |            |
| No                                           | 73        | 9.4        |
| Yes                                          | 696       | 90.6       |
| <b>Duration of breastfeeding (in months)</b> |           |            |
| Less than 6 months                           | 83        | 10.8       |
| 6-12 months                                  | 123       | 15.9       |
| 12-24 months                                 | 196       | 25.5       |
| More than 24 months                          | 368       | 47.8       |
| <b>Deworming</b>                             |           |            |
| Never                                        | 22        | 2.8        |

|                         |     |      |
|-------------------------|-----|------|
| Occasionally            | 377 | 49.0 |
| Regularly (3 monthly)   | 370 | 48.1 |
| <b>Gadget Addiction</b> |     |      |
| Low Gadget Addiction    | 408 | 53.0 |
| High Gadget Addiction   | 361 | 46.9 |

SD, Standard Deviation; BDT, Bangladeshi Taka, NVD, Normal Vaginal Delivery

**Table 3: Cognitive function of the study participants and associated factors (n=769)**

| Variables                                  | AOR       | p-value          | 95% CI      |
|--------------------------------------------|-----------|------------------|-------------|
| <b>Gadget Addiction</b>                    |           |                  |             |
| Low Gadget Addiction                       | Reference |                  |             |
| High Gadget Addiction                      | 0.4       | <b>&lt;0.001</b> | 0.3 to 0.7  |
| <b>Age (in years)</b>                      | 1.0       | 0.4              | 0.9 to 1.2  |
| <b>Gender</b>                              |           |                  |             |
| Male                                       | Reference |                  |             |
| Female                                     | 1.1       | 0.6              | 0.7 to 1.7  |
| <b>Residence</b>                           |           |                  |             |
| Rural                                      | Reference |                  |             |
| Urban                                      | 0.9       | 0.6              | 0.5 to 1.5  |
| <b>Type of family</b>                      |           |                  |             |
| Nuclear                                    | Reference |                  |             |
| Joint                                      | 0.9       | 0.9              | 0.6 to 1.6  |
| <b>Birth Order</b>                         |           |                  |             |
| 1 <sup>st</sup> or second                  | Reference |                  |             |
| Third or more than third                   | 0.9       | 0.6              | 0.6 to 1.4  |
| <b>Monthly family income (in BDT)</b>      |           |                  |             |
| Less than 10,000                           | Reference |                  |             |
| 10,000 to 20,000                           | 0.9       | 0.6              | 0.5 to 1.5  |
| More than 20,000                           | 0.9       | 0.8              | 0.5 to 1.8  |
| <b>Maximum years of parental education</b> |           |                  |             |
| <8                                         | Reference |                  |             |
| 8 to 12                                    | 0.9       | 0.96             | 0.59 to 1.7 |
| >12                                        | 0.9       | 0.80             | 0.5 to 1.7  |
| <b>Mode of delivery</b>                    |           |                  |             |
| Do not know                                | Reference |                  |             |
| NVD by others                              | 1.0       | 0.9              | 0.3 to 3.8  |
| NVD by Doctor                              | 1.5       | 0.5              | 0.4 to 5.2  |

|                                              |           |      |            |
|----------------------------------------------|-----------|------|------------|
| C/S                                          | 1.2       | 0.8  | 0.3 to 4.2 |
| <b>EPI vaccination</b>                       |           |      |            |
| No                                           | Reference |      |            |
| Yes                                          | 1.1       | 0.8  | 0.5 to 2.7 |
| <b>Duration of breastfeeding (in months)</b> |           |      |            |
| Less than 6 months                           | Reference |      |            |
| 6-12 months                                  | 2.5       | 0.02 | 1.1 to 5.4 |
| 12-24 months                                 | 2.0       | 0.05 | 1.0 to 4.3 |
| More than 24 months                          | 2.4       | 0.01 | 1.0 to 4.7 |
| <b>Deworming</b>                             |           |      |            |
| Never                                        | Reference |      |            |
| Occasionally                                 | 0.7       | 0.6  | 0.2 to 2.3 |
| Regularly (3 monthly)                        | 0.9       | 0.9  | 0.3 to 3.3 |

AOR, adjusted odds ratio; CI, confidence interval; p-value < 0.05 is in bold

**Table 4: Problematic Media Use Measure Questionnaire and responses of the participant**

| <b>Digital Addiction Question</b>                                                                       | <b>Never</b>   | <b>Seldom</b>  | <b>Sometimes</b> | <b>Frequently</b> | <b>Always</b>  | <b>Mean score</b> |
|---------------------------------------------------------------------------------------------------------|----------------|----------------|------------------|-------------------|----------------|-------------------|
|                                                                                                         | <b>Score 1</b> | <b>Score 2</b> | <b>Score 3</b>   | <b>Score 4</b>    | <b>Score 5</b> |                   |
| It is hard for my child to stop using screen media                                                      | 47.6           | 11.0           | 33.0             | 2.0               | 5.3            | 2.0               |
| Screen media is the only thing that seems to motivate my child                                          | 51.0           | 11.4           | 26.4             | 3.2               | 7.9            | 2.0               |
| Screen media is all that my child seems to think about                                                  | 54.0           | 8.8            | 27.2             | 3.7               | 5.4            | 1.0               |
| My child's screen media use interferes with family activities                                           | 47.0           | 11.0           | 31.9             | 2.9               | 7.1            | 2.1               |
| My child's screen media use causes problems for the family                                              | 67.4           | 8.8            | 18.5             | 1.5               | 3.8            | 1.7               |
| My child becomes frustrated when he/she cannot use screen media                                         | 64.6           | 10.6           | 19.8             | 1.0               | 3.0            | 1.7               |
| The amount of time my child wants to use screen media keeps increasing                                  | 61.8           | 13.1           | 17.0             | 4.0               | 2.9            | 1.7               |
| My child sneaks using screen media                                                                      | 75.7           | 7.4            | 14.3             | 1.2               | 1.4            | 1.5               |
| When my child has had a bad day, screen media seems to be the only thing that helps him/her feel better | 52.6           | 9.8            | 29.4             | 1.8               | 6.4            | 2.0               |

1  
2  
3  
4  
5  
6  
7  
8  
9  
10  
11  
12  
13  
14  
15  
16  
17  
18  
19  
20  
21  
22  
23  
24  
25  
26  
27  
28  
29  
30  
31  
32  
33  
34  
35  
36  
37  
38  
39  
40  
41  
42  
43  
44  
45  
46  
47  
48  
49  
50  
51  
52  
53  
54  
55  
56  
57  
58  
59  
60

Confidential: For Review Only

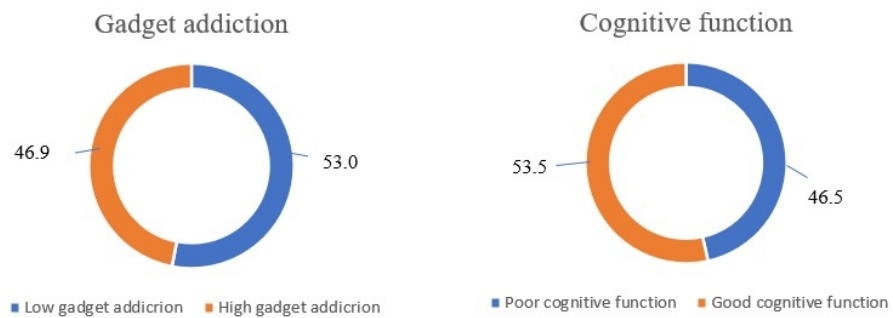

Prevalence of gadget addiction and cognitive function among school-going children (n=769)

290x128mm (72 x 72 DPI)
